# Supplementary material for: Concurrent and Predictive Validity of an Exercise-Specific Scale for the Perception of Velocity in the Back Squat
Source: MDPI journal article supplement (doi:10.3390/ijerph191811440), 2022-09-11

**Supplementary materials – S1:** Bland-Altman Plots. Agreement between Vp and Vr for light, medium and heavy loads in the 3 days of evaluation.

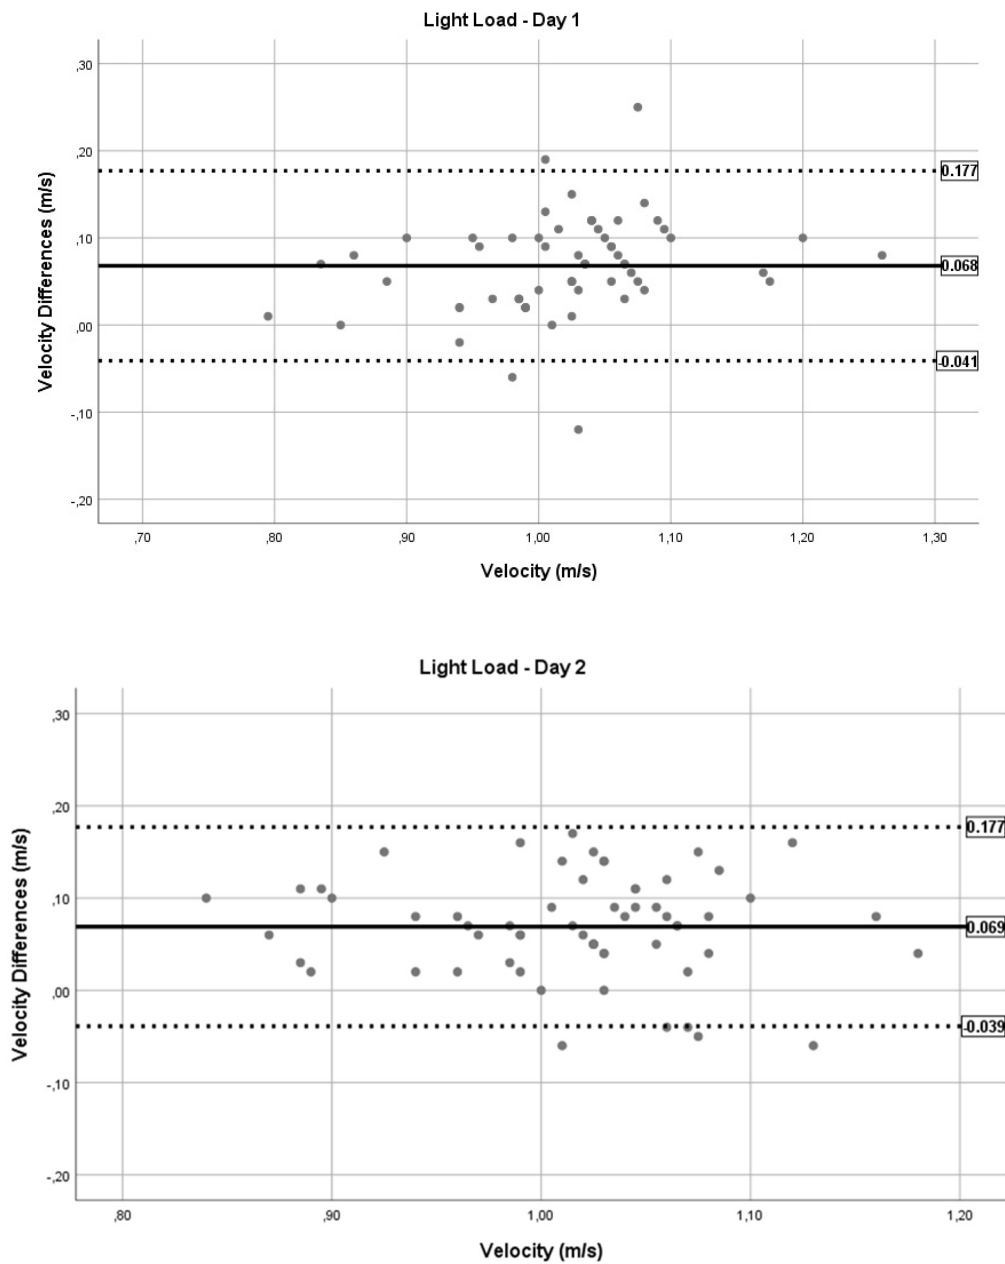

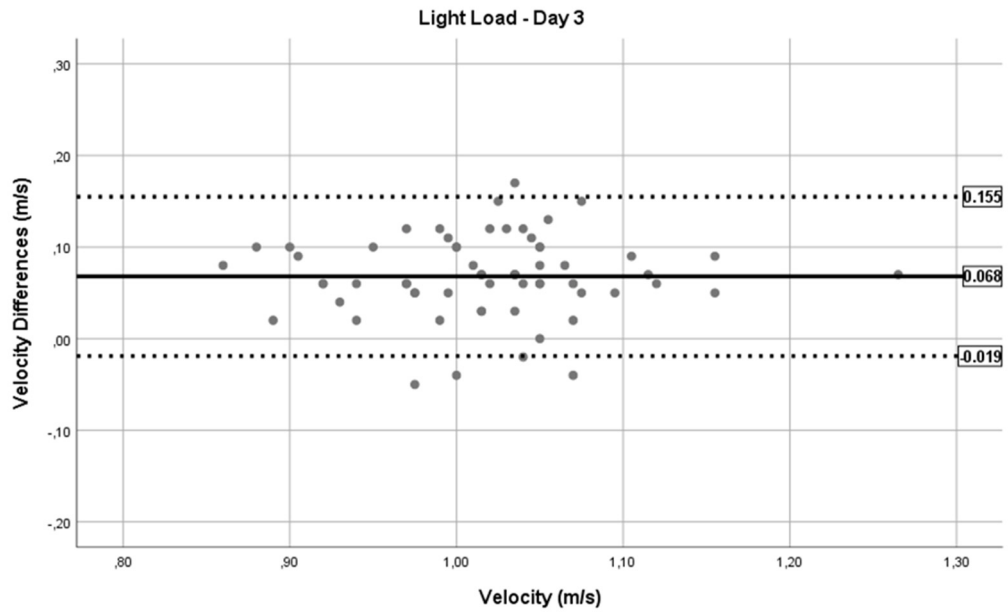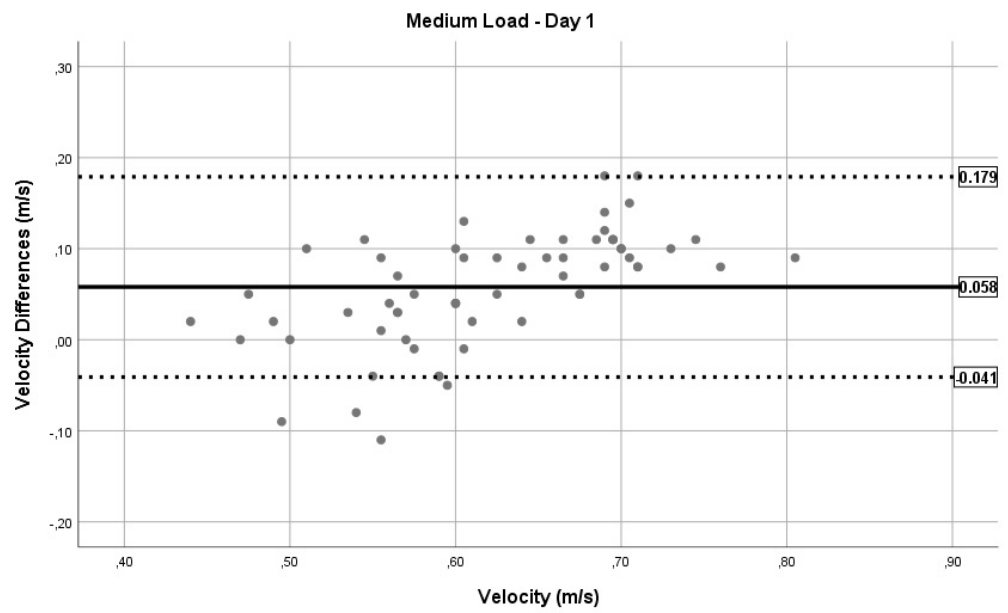

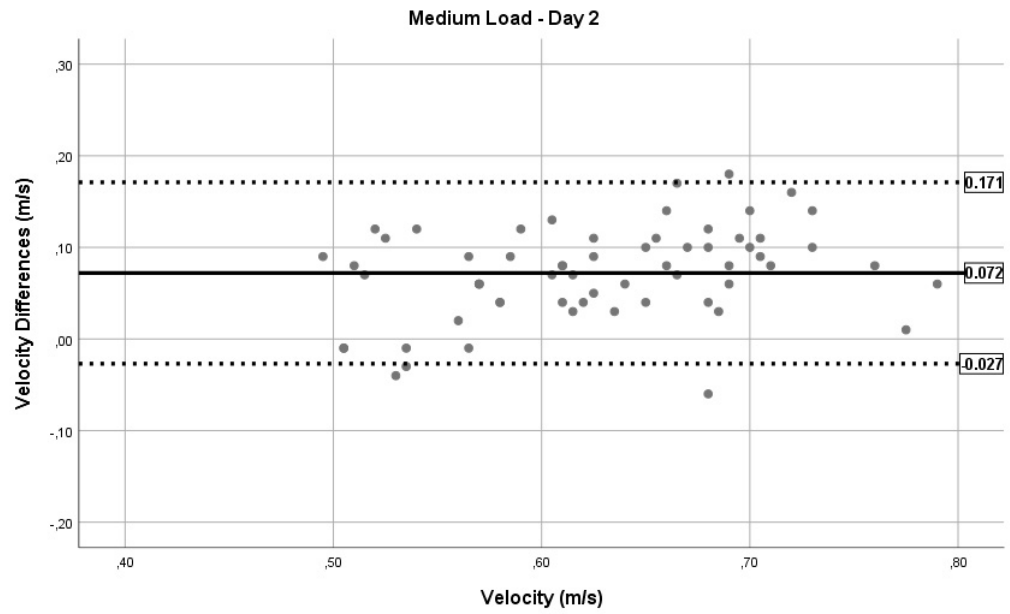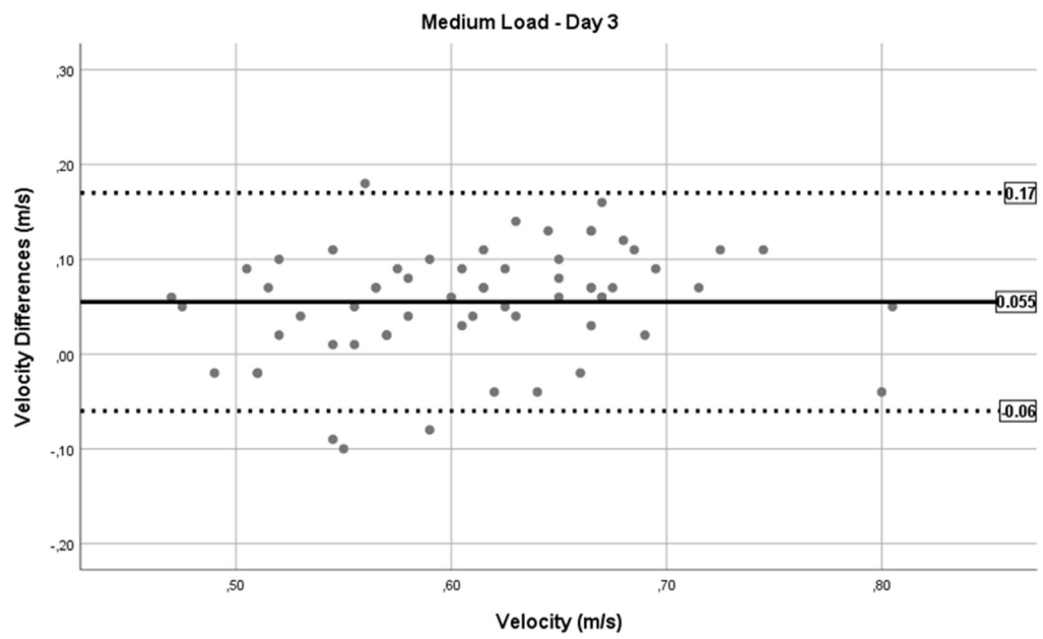

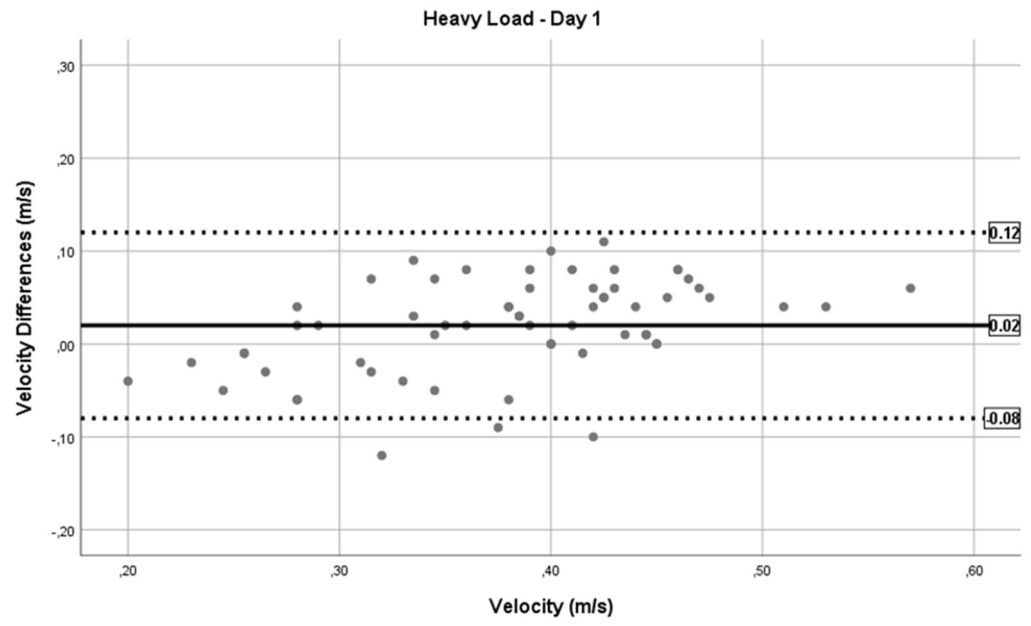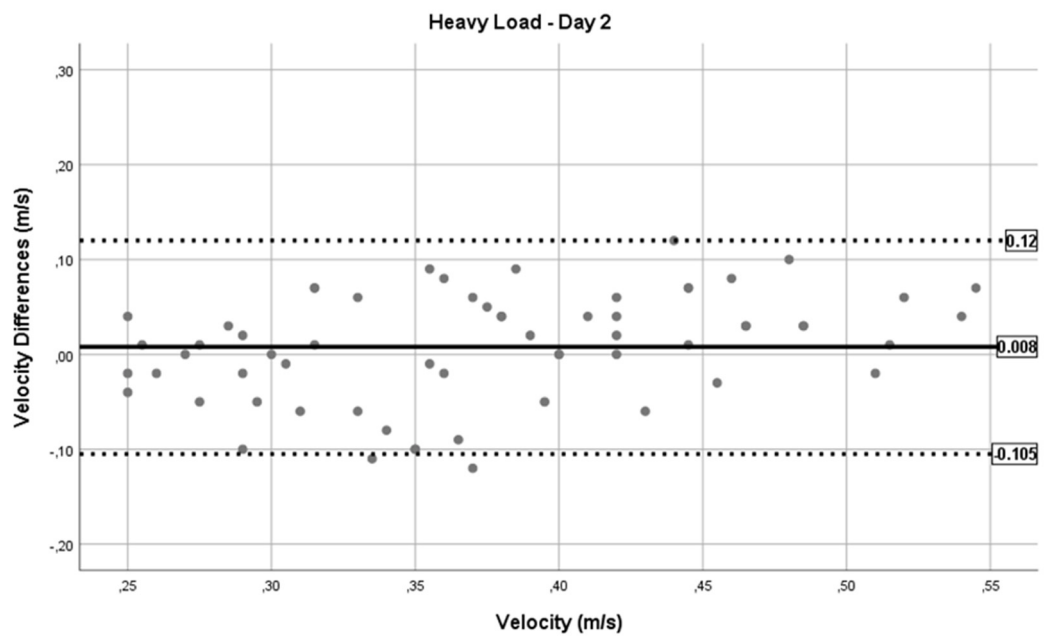

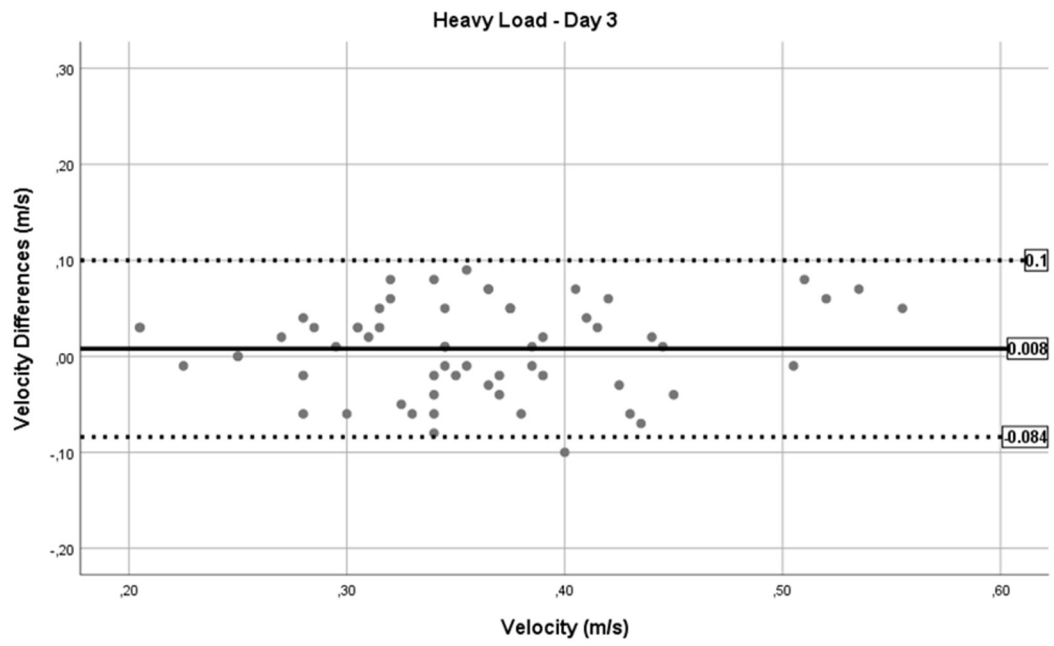

Supplement: s1 [file s1]
